# Supplementary material for: HO-1 Modulates Aerobic Glycolysis through LDH in Prostate Cancer Cells
Source: MDPI journal article supplement (doi:10.3390/antiox10060966), 2021-06-16
Supplement: s1 [file s1]

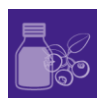

## Supplementary Materials:

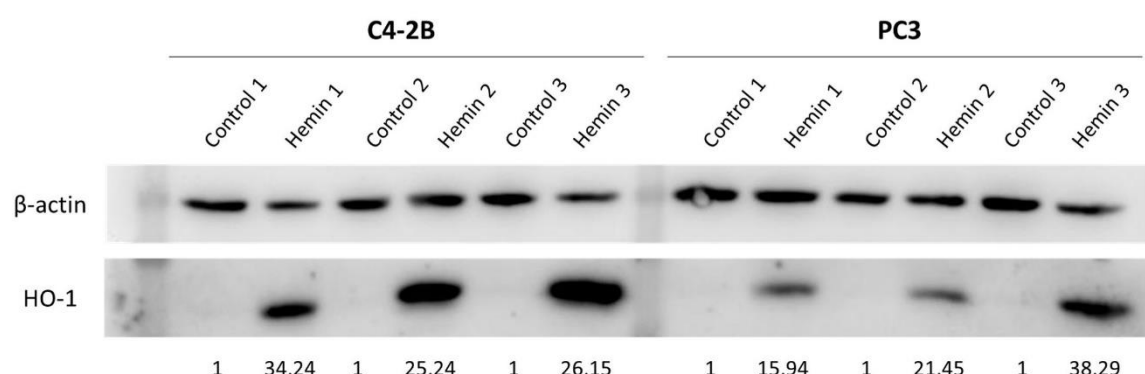

**Figure S1. HO-1 induction by hemin treatment in PCa cells.** Western Blot analysis for HO-1 and  $\beta$ -actin in control and hemin treated (80  $\mu$ M, 24 h) PC3 and C4-2B cells. Protein quantification, normalized to  $\beta$ -actin (loading reference) and to control lane, is indicated under each band. Three independent experiments are shown.

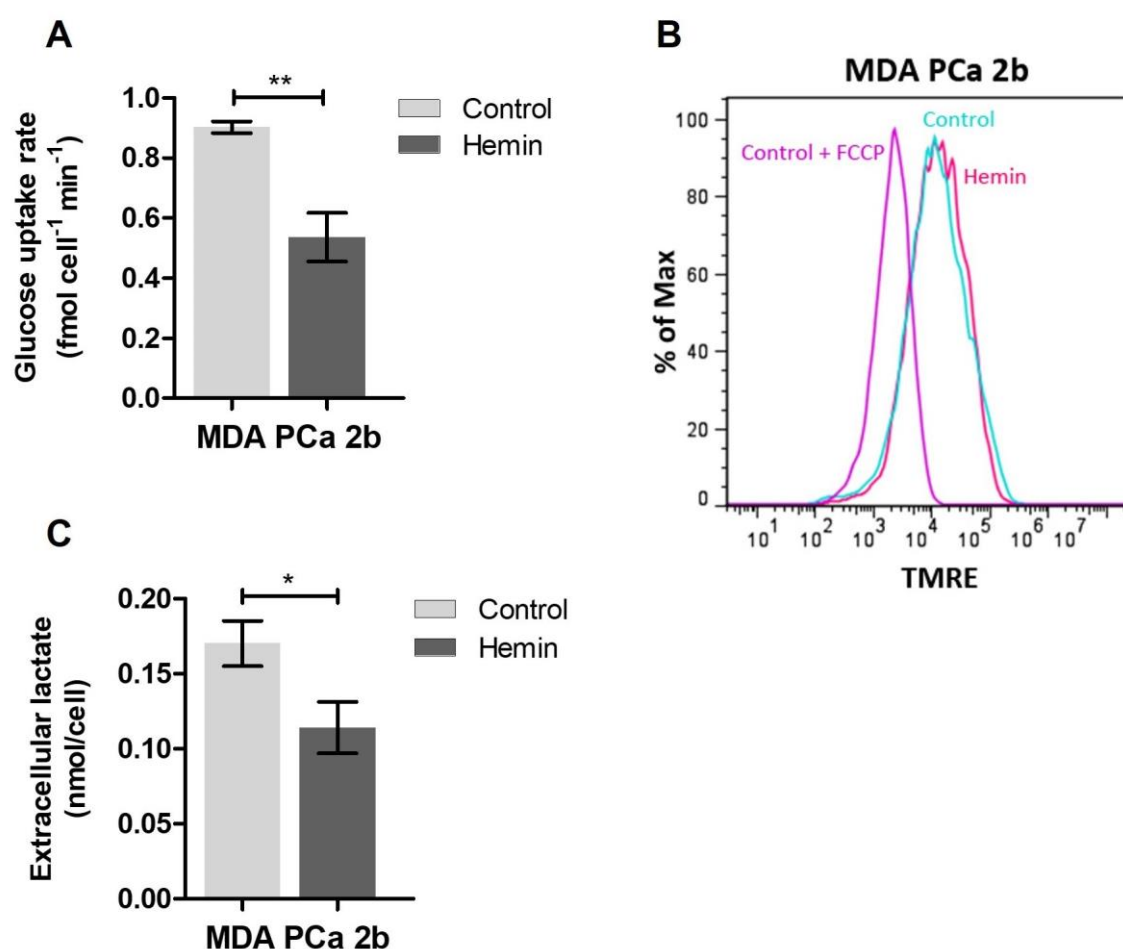

**Figure S2. Impact of HO-1 induction in MDA PCa 2b cells.** (A) Glucose uptake rate after hemin treatment (80  $\mu$ M, 24 h), was determined using the Glucose Uptake-Glo Assay (Promega, USA). (B) Mitochondrial integrity was evaluated after hemin treatment by flow cytometry using the potential-sensitive dye TMRE. Pre-treatment of control cells with the uncoupler FCCP was used to determine the baseline. One representative of three independent experiments is shown. (C) Extracellular lactate levels measured in the conditioned media of hemin treated cells using the Lactate Colorimetric Assay Kit II (BioVision, USA) and normalized to the number of cells. Significant differences: \*  $p < 0.05$ ; \*\*  $p < 0.01$ .
